# Supplementary material for: A Ag–ZrO2–graphene oxide nanocomposite as a metal-leaching-resistant catalyst for the aqueous-phase hydrogenation of levulinic acid into gamma-valerolactone
Source: Royal Society of Chemistry journal article supplement (doi:10.1039/d0nj03892j), 2020-01-01
Supplement: d0nj03892j1.pdf [file d0nj03892j1.pdf]

## Supplementary Information

### Ag-ZrO<sub>2</sub>-graphene oxide nanocomposite as a metal-leaching-resistant catalyst for the aqueous-phase hydrogenation of levulinic acid into gamma-valerolactone

Xufeng Bai<sup>1</sup>, Ting Rin<sup>1,2</sup>, Jingbo Mao<sup>1</sup>, Shenmin Li<sup>1\*</sup>, Jingmei Yin<sup>1</sup>, and Jinxia Zhou<sup>1\*</sup>

<sup>1</sup> College of Environmental and Chemical Engineering, Dalian University, Dalian, 116622, China.

<sup>2</sup> No. 3 Middle School of Liaocheng, North District, Liaocheng 252000, China

\* Corresponding Email: [zhoujxmail@163.com](mailto:zhoujxmail@163.com) (J. Z.); [lishenmin@dlu.edu.cn](mailto:lishenmin@dlu.edu.cn) (S. L.)

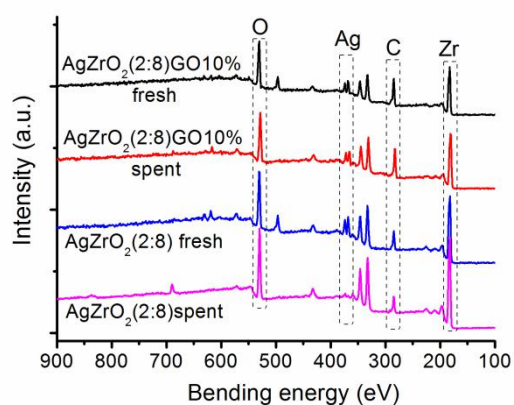

Fig. S1 The whole XPS survey profiles of the fresh and spent AgZrO<sub>2</sub>(2:8)GO10% and AgZrO<sub>2</sub>(2:8) catalysts.

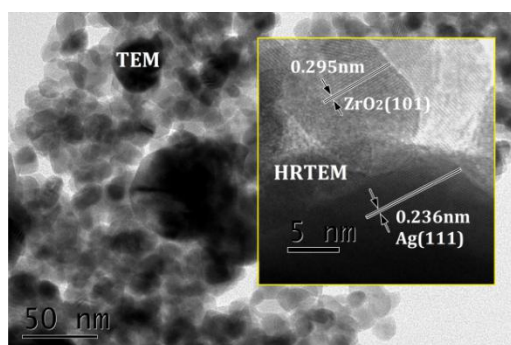

Fig. S2 TEM and HRTEM images of the spent AgZrO<sub>2</sub>(2:8) catalyst.

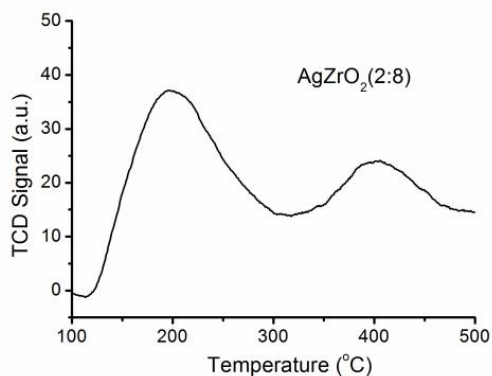

**Fig. S3** NH<sub>3</sub>-TPD analysis of AgZrO<sub>2</sub>(2:8).

The catalysts containing graphene oxide (GO) cannot undergo NH<sub>3</sub>-TPD analysis because of the thermal reaction between GO and NH<sub>3</sub>. Reference [S1] and [S2] introduced chemical methods to obtain N-doped graphene through thermal annealing of GO in an NH<sub>3</sub> atmosphere. GO sheets annealed at various reaction temperatures reveals that N-doping occurs at a temperature as low as 300 °C, while the doping levels of N vary between 300 and 1100 °C. Oxygen groups in GO were found responsible for reactions with NH<sub>3</sub> and C-N bond formation. The functional groups such as carbonyl, carboxyl, lactone and quinone at the edges and in the plane of graphene oxide were favorable for the binding of nitrogen.

We tested the acidity of AgZrO<sub>2</sub>(2:8) by NH<sub>3</sub>-TPD analysis. As shown in Fig. S3. The large desorption peak at around 200 °C and the small desorption peak at around 400 °C in the sample curve indicate that it has sufficient weak acid sites and a few moderately strong acid sites. It means that the *t*-ZrO<sub>2</sub> component possesses acidity and can perform acidic catalysis. AgZrO<sub>2</sub>(2:8)GO10% and AgZrO<sub>2</sub>(2:8) contain the same *t*-ZrO<sub>2</sub> component according to the XRD and XPS analysis. Therefore, the *t*-ZrO<sub>2</sub> component of AgZrO<sub>2</sub>(2:8)GO10% can also perform acidic catalysis.

## Reference

[S1] X. Li, H. Wang, J. T. Robinson, H. Sanchez, G. Diankov, H. Dai, *J. Am. Chem. Soc.* 131(2009)15939-15944.

[S2] S. Yang, L. Zhi, K. Tang, X. Feng, J. Maier, K. Müllen, *Adv. Funct. Mater.* 17(2012)3634-3640.
